# Supplementary material
Source: publisher figshare collection journal article supplement (https://acs.figshare.com/ndownloader/files/4302184)
Supplement: Supplementary file 1 [file 4302184]

## Supporting Information for

### **Solvent effects at the photoelectrode/electrolyte interface of a DSC: A combined spectroscopic and photoelectrochemical study**

by

Thomas Stergiopoulos, Athanassios G. Kontos\*, Vlassis Likodimos, Dorothea Perganti and Polycarpos Falaras\*

Institute of Physical Chemistry, NCSR “Demokritos”, Agia Paraskevi Attikis, 15310 Athens, Greece

|         |                                                                                                            |
|---------|------------------------------------------------------------------------------------------------------------|
| Page S2 | Raman Spectra (Fig. S1) and intensities (Fig. S2) of Raman modes under electrical polarization of the DSCs |
| Page S3 | Nyquist plots for DSCs using different solvents (Fig. S3)                                                  |
| Page S4 | Electron transit times for DSCs using different solvents (Fig. S4)                                         |

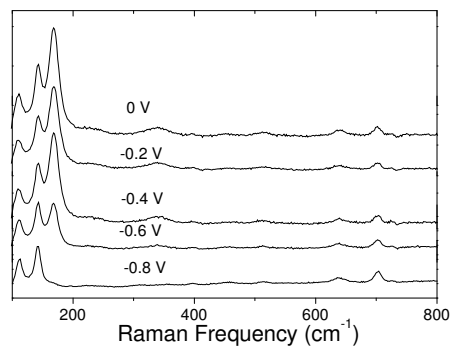

Fig. S1 In situ Raman characterization of the low frequency spectral region for MPN based DSCs by varying the electrical polarization of the cells.

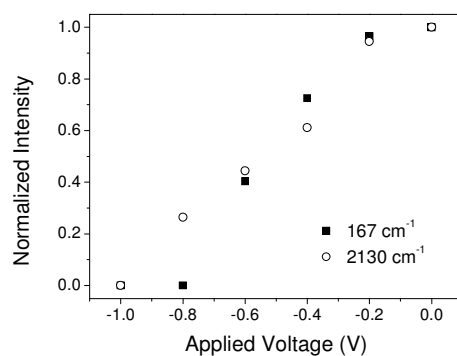

Fig. S2 Normalized intensity of the 167 and 2130  $\text{cm}^{-1}$  Raman modes to their maximum intensity value obtained under short circuiting of the DSC containing MPN based electrolyte vs. applied potential.

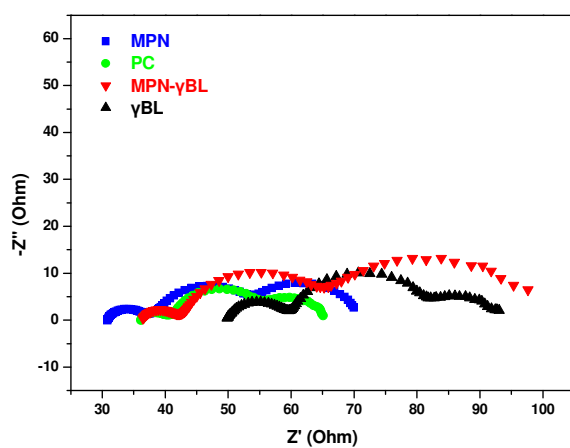

Fig. S3 Nyquist plots derived from EIS spectra on DSCs based on different solvents illuminated under white light illumination (1 sun) at -0.85 V vs. Pt.

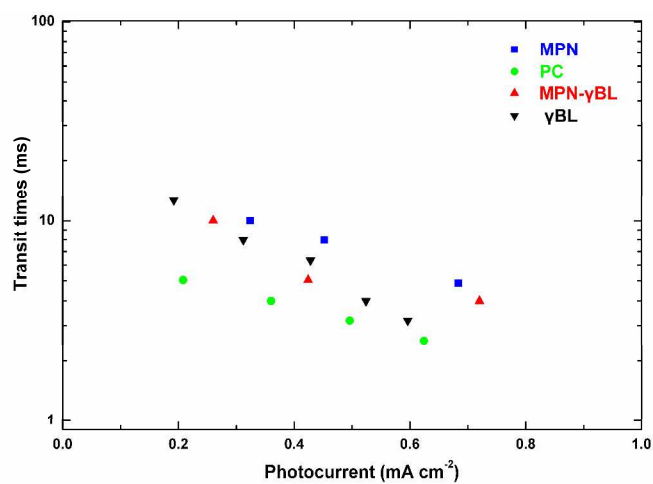

Fig. S4 Electron transit times versus the short-circuit photocurrent (log plot) derived from IMPS experiments on DSCs based on electrolytes using different solvents.
